# Supplementary material for: An unusual temperature induced isostructural phase transition in a scheelite, Li0.5Ce0.5MoO4
Source: Royal Society of Chemistry journal article supplement (doi:10.1039/c3dt33033h), 2013-01-01
Supplement: c3dt33033h.pdf [file c3dt33033h.pdf]

Supplementary information for

An unusual temperature induced isostructural phase  
transition in Scheelite  $\text{Li}_{0.5}\text{Ce}_{0.5}\text{MoO}_4$

*Dipankar Saha,<sup>†</sup> Rajeev Ranjan,<sup>‡</sup> Diptikanta Swain,<sup>§</sup> Chandrabhas Narayana<sup>§</sup> and Tayur N.*

*Guru Row<sup>†,\*</sup>*

<sup>†</sup>Solid State and Structural Chemistry Unit, Indian Institute of Science, Bangalore 560 012, India.

<sup>‡</sup>Materials Engineering, Indian Institute of Science, Bangalore 560 012, India.

<sup>§</sup>Light Scattering Laboratory, Chemistry and Physics of Materials Unit, Jawaharlal Nehru Centre for Advanced Scientific Research (JNCASR), Jakkur P.O., Bangalore 560064, India.

---

\* Corresponding author: E-mail: [ssctng@sscu.iisc.ernet.in](mailto:ssctng@sscu.iisc.ernet.in) Tel: +91-80-2292796 Fax: +91-80-3601310

Table S1. Intensity ratios between peaks of the main phase and surrogate phase.

| Selected 2 $\theta$ Values | Peak intensity in % |                 |
|----------------------------|---------------------|-----------------|
|                            | Main Phase          | Surrogate Phase |
| 18.15                      | 100                 | 100             |
| 19.56                      | 13.55               | 13.35           |
| 21.64                      | 22.97               | 23.62           |
| 29.30                      | 39.17               | 37.29           |
| 30.75                      | 18.92               | 16.17           |
| 33.34                      | 18.19               | 19.15           |
| 35.90                      | 58.02               | 56.03           |
| 36.68                      | 17.56               | 14.27           |

Table S2. List of oxygen coordinates after Rietveld refinements.

| Temperature (°C) | Phase | <i>x</i> | <i>y</i> | <i>z</i> |
|------------------|-------|----------|----------|----------|
| 550              | 1     | 0.246(1) | 0.393(1) | 0.043(1) |
|                  | 2     | 0.243(2) | 0.396(2) | 0.044(2) |
| 490              | 1     | 0.238(1) | 0.392(1) | 0.044(1) |
|                  | 2     | 0.242(1) | 0.376(2) | 0.041(1) |
| 450              | 1     | 0.242(2) | 0.390(1) | 0.042(1) |
|                  | 2     | 0.240(1) | 0.395(1) | 0.042(2) |
| 400              |       | 0.242(1) | 0.389(2) | 0.040(1) |
| 300              |       | 0.240(1) | 0.391(1) | 0.043(1) |
| 200              |       | 0.240(1) | 0.393(1) | 0.041(1) |
| 100              |       | 0.244(1) | 0.390(1) | 0.042(1) |
| 25               |       | 0.241(1) | 0.394(1) | 0.042(1) |

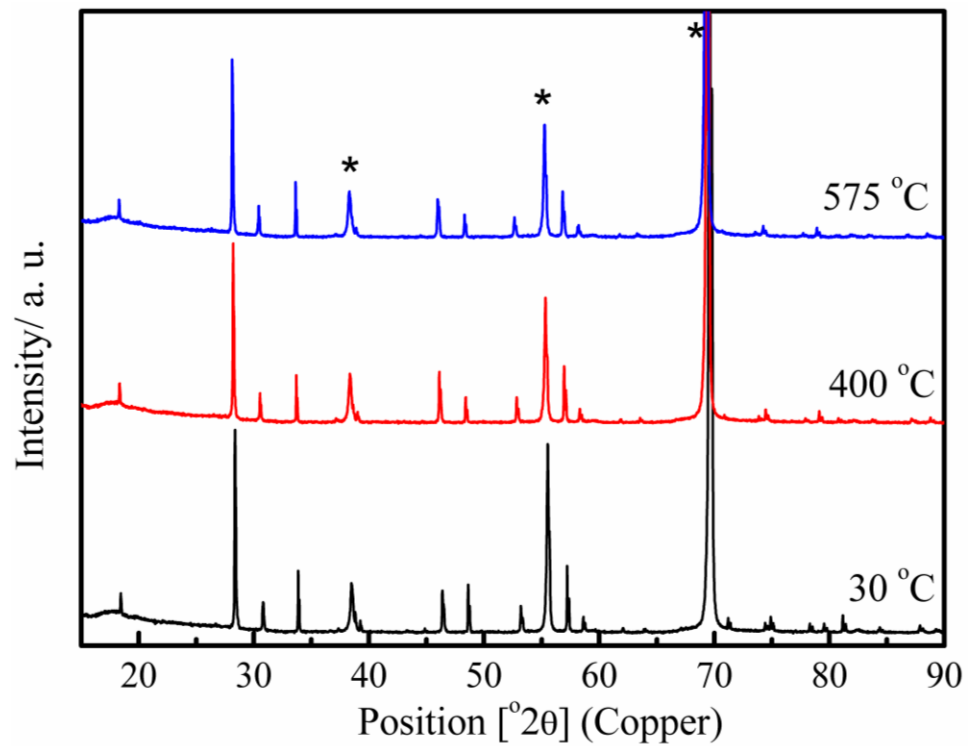

**Figure S1** Laboratory powder X-ray diffractogram of LCM at different temperature

(\* Bragg peaks from Ta strip).

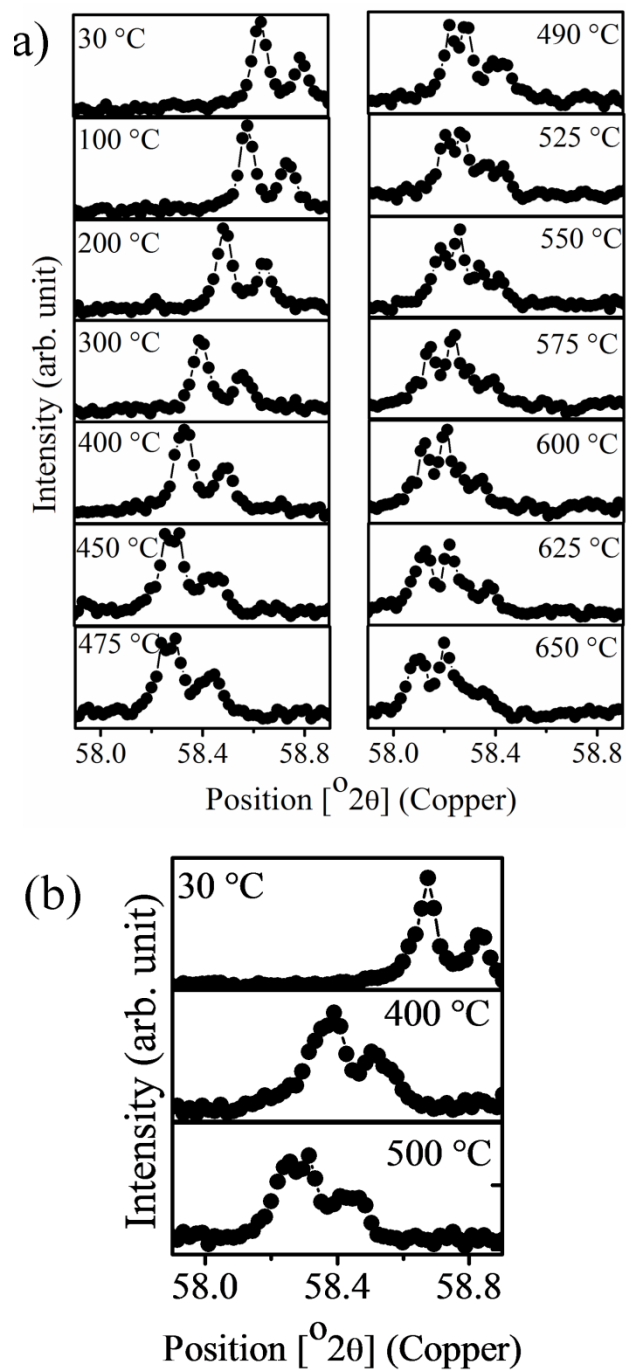

**Figure S2** Laboratory powder X-ray diffractogram of LCM in a narrow  $2\theta$  interval at different temperature (a) Heating cycle (b) Cooling cycle.
